# Supplementary material for: Serum-Resistant Ternary DNA Polyplexes for Suicide Gene Therapy of Uterine Leiomyoma
Source: MDPI journal article supplement (doi:10.3390/ijms25010034), 2023-12-19
Supplement: s1 [file s1]

# **Serum-resistant ternary DNA-polyplexes for suicide gene therapy of uterine leiomyoma**

**Anna Egorova <sup>1</sup>, Sofia Shtykalova <sup>1</sup>, Marianna Maretina <sup>1</sup>, Svetlana Freund <sup>1</sup>, Alexander Selutin <sup>2</sup>, Natalia Shved <sup>1</sup>, Sergei Selkov <sup>2</sup>, and Anton Kiselev <sup>1,\*</sup>**

<sup>1</sup> Department of Genomic Medicine named after V.S. Baranov, D.O. Ott Research Institute of Obstetrics, Gynecology and Reproductology, Mendelevskaya line 3, 199034 Saint-Petersburg, Russia; egorova\_anna@yahoo.com (A.E.); sofia.shtykalova@gmail.com (S.S.); marianna0204@gmail.com (M.M.); svetafreundmax@gmail.com (S.F.); natashved@mail.ru (N.S.);

<sup>2</sup> Department of Immunology and Intercellular Interactions, D.O. Ott Research Institute of Obstetrics, Gynecology and Reproductology, Mendelevskaya line 3, 199034 Saint-Petersburg, Russia; a\_selutin@yahoo.com (A.S.); selkovsa@mail.ru (S.S.)

\* Correspondence: ankiselev@yahoo.co.uk; Tel.: +7-812-328-9809

## Contents

|                                                                                                                                           |   |
|-------------------------------------------------------------------------------------------------------------------------------------------|---|
| <b>Figure S1.</b> Evaluation of the cytotoxicity after transfection of PANC-1 cells with DNA/R6p/E6p and DNA/R6p/E6p-cRGD polyplexes..... | 3 |
| <b>Figure S2.</b> Typical micrographs of the ternary polyplexes obtained by transmission electronic microscopy.....                       | 5 |

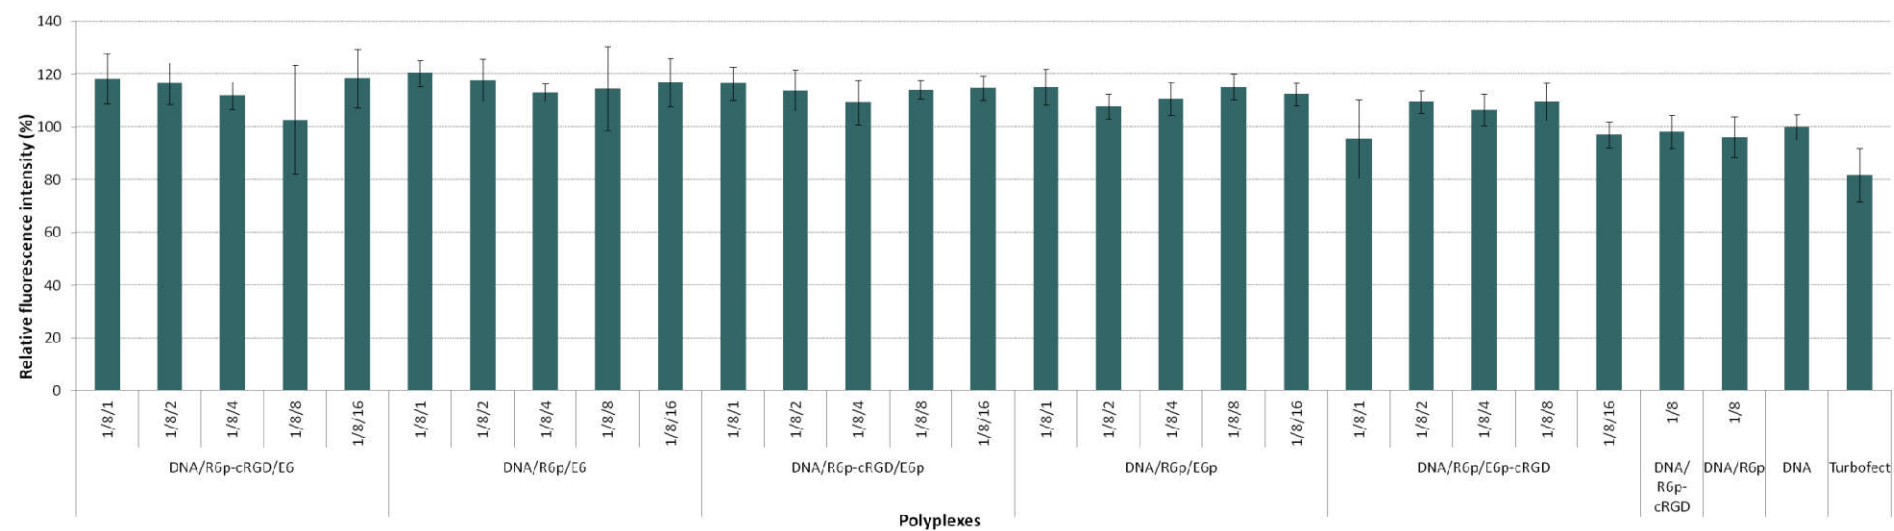

(a)

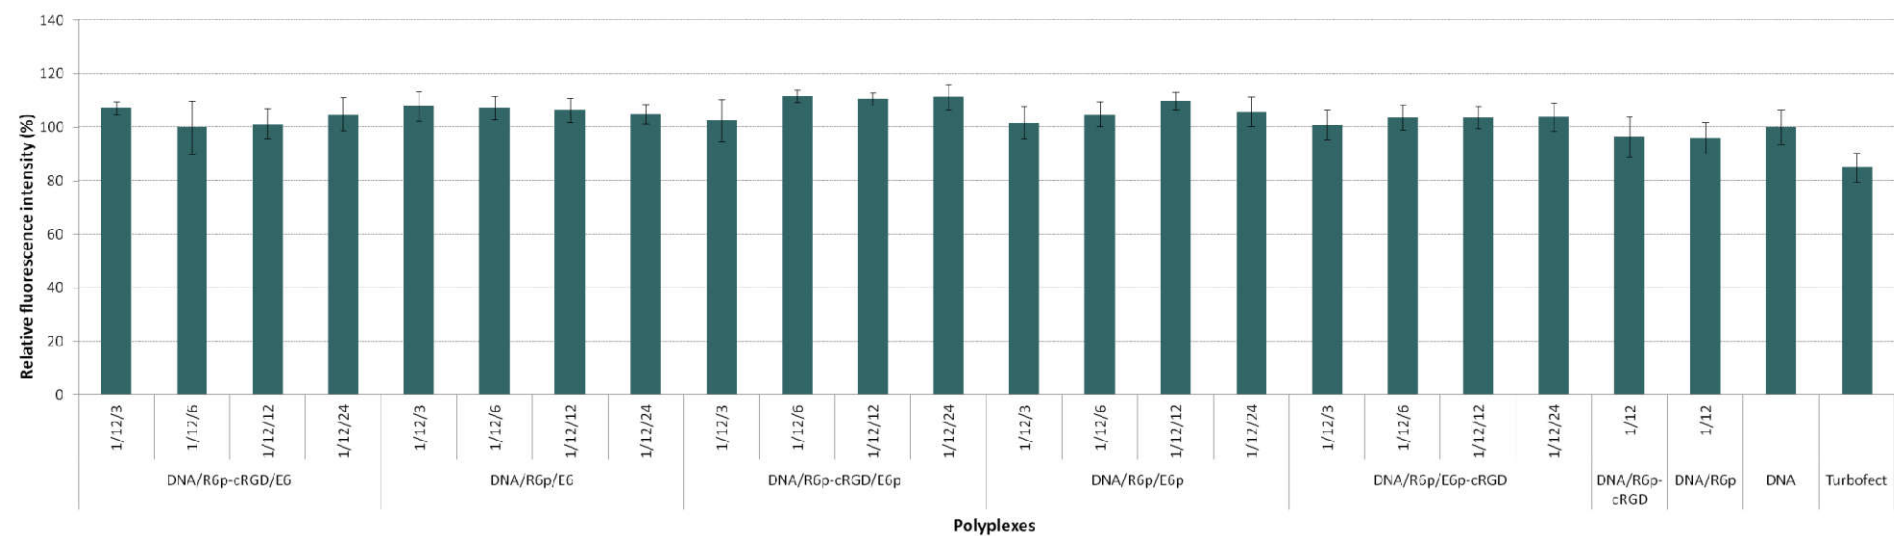

(b)

**Figure S1.** Evaluation of the cytotoxicity after transfection of PANC-1 cells with DNA/R6p/E6p and DNA/R6p/E6p-cRGD polyplexes formed at different P/N/C ratios: **(a)** N/P ratio of 8/1; **(b)** N/P ratio of 12/1. Values are the mean  $\pm$  SD of the mean of triplicates.

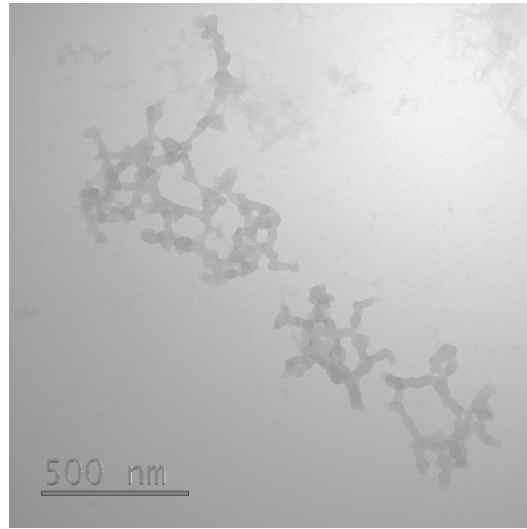

(a)

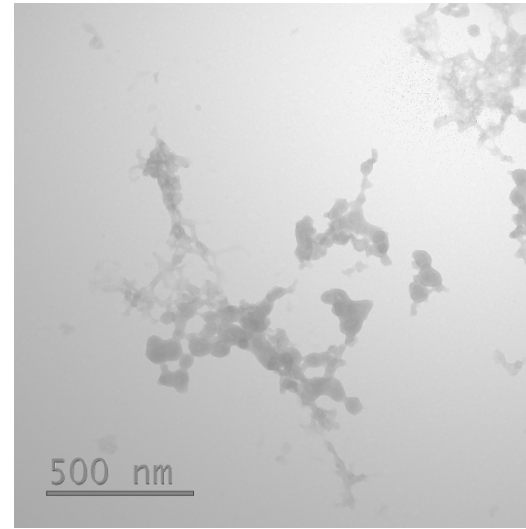

(b)

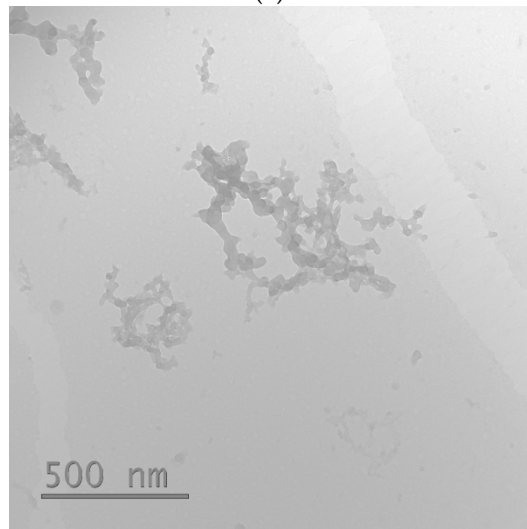

(c)

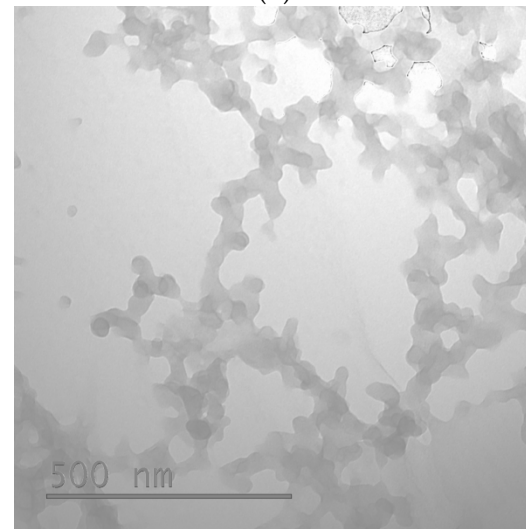

(d)

**Figure S2.** Typical micrographs of the ternary polyplexes obtained by transmission electronic microscopy: **(a)** DNA/R6p/E6p at P/N/C ratio 1/8/4; **(b)** DNA/R6p/E6p at P/N/C ratio 1/12/6; **(c)** DNA/R6p/E6p at P/N/C ratio 1/12/12; **(d)** DNA/R6p/E6p-cRGD at P/N/C ratio 1/12/6.
